# Supplementary material for: Mesenchymal stem cell senescence alleviates their intrinsic and seno-suppressive paracrine properties contributing to osteoarthritis development
Source: publisher site journal article supplement (doi:10.18632/aging.102379), 2019-10-22
Supplement: Supplementary file [file aging-v11i20-102379-supplementary-material-SD2.pdf]

## SUPPLEMENTARY TABLE

**Supplementary Table 1. Primer list.**

| <b>Gene (human)</b>   | <b>Forward primer 5'-3'</b> | <b>Reverse primer 5'-3'</b> |
|-----------------------|-----------------------------|-----------------------------|
| p16 <sup>INK4a</sup>  | GAAGGTCCCTCAGACATCCCC       | CCCTGTAGGACCTTCGGTGAC       |
| p21 <sup>cdkn1a</sup> | TGTCCGTCAGAACCCATGC         | AAAGTCGAAGTTCCATCGCTC       |
| p15 <sup>INK4b</sup>  | GACCGGAATAACCTTCCAT         | CACCAGGTCCAGTCAAGGAT        |
| p27 <sup>KIP1</sup>   | CGGCTAACTCTGAGGACACG        | CTTCTGAGGCCAGGCTTCTT        |
| TGF- $\beta$ 1        | CTAATGGTGGAAACCCACAACG      | TATCGCCAGGAATTGTTGCTG       |
| ADAMTS3               | GAACATCGACCAACTCTACTCCG     | CAATGCCACCGAACCATCT         |
| Aggrecan              | TCGAGGACAGCGAGGCC           | TCGAGGGTGTAGCGTGTAGAGA      |
| Col3                  | AGGGCCTGA AGGACCAGCTT       | CGCCCTCCTAATGGTCAAGG        |
| 28S                   | CGATCCATCATCCGCAATG         | AGCCAAGCTCAGCGCAAC          |
| <b>Gene (mouse)</b>   | <b>Forward primer 5'-3'</b> | <b>Reverse primer 5'-3'</b> |
| p16 <sup>INK4a</sup>  | CGCAGGTTCTTCGTCACTGT        | TGTTCACGAAAGCCAGAGCG        |
| p19 <sup>ARF</sup>    | GCTCTGGCTTTTCGTGAACATG      | TCGAATCTGCACCGTAGTTGAG      |
| p21 <sup>cdkn1a</sup> | GTACTIONCTCTGCCCTGCTG       | TCTGCGCTTGGAGTGATAGA        |
| IL-1 $\beta$          | GTATGGGCTGGACTGTTTC         | GCTGTCTGCTCATTACAG          |
| IL-6                  | TAGTCCTTCCTACCCCAATTTCC     | TTGGTCCTTAGCCACTCCTTC       |
| MMP-13                | GGAGCCCTGATGTTTCCCAT        | GTCTTCATCGCCTGGACCATA       |
| GAPDH                 | GGCAAATTCAACGGCACAGT        | GTCTCGCTCCTGGAAGATGG        |
